# Supplementary material for: The highly efficient elimination of intracellular bacteria via a metal organic framework (MOF)-based three-in-one delivery system
Source: Royal Society of Chemistry journal article supplement (doi:10.1039/c9nr01284b), 2019-01-01
Supplement: c9nr01284b1.pdf [file c9nr01284b1.pdf]

**Electronic supplementary information for:**

**High-efficient elimination of intracellular bacteria via a metal organic frameworks (MOFs) based three-in-one delivery system**

*Xu Zhang,<sup>a</sup> Lizhi Liu,<sup>a</sup> Lunjie Huang,<sup>a</sup> Wentao Zhang,<sup>a</sup> Rong Wang,<sup>a</sup> Tianli Yue,<sup>a</sup> Jing Sun,<sup>b</sup> Guoliang Li,<sup>c</sup> and Jianlong Wang<sup>\*a</sup>*

a. College of Food Science and Engineering, Northwest A&F University, Yangling, 712100, Shaanxi, China.

b. Qinghai Key Laboratory of Qinghai-Tibet Plateau Biological Resources, Northwest Institute of Plateau Biology, Chinese Academy of Sciences, 810008, Qinghai, China.

c. Key Laboratory of Life-Organic Analysis of Shandong Province, Qufu Normal University, Qufu, 273165, Shandong, China.

*\* Corresponding author: wanglong79@yahoo.com (JL, Wang)*

**Contents**

|                                                       |           |
|-------------------------------------------------------|-----------|
| <b>1. Experimental</b>                                | <b>2</b>  |
| 1.1 Synthesis of ZIF-67                               | 2         |
| 1.2 Synthesis of MOF-5                                | 2         |
| 1.3 Synthesis of HKUST-1                              | 2         |
| 1.4 Antibiotics encapsulated and HA decorated of MOFs | 2         |
| 1.5 PVP exchange                                      | 2         |
| 1.6 Mediating effect of HA                            | 2         |
| <b>2. Results and discussion</b>                      | <b>4</b>  |
| <b>References</b>                                     | <b>20</b> |

## 1.Experimental

### 1.1 Synthesis of ZIF-67

In a typical synthesis of ZIF-67,<sup>1</sup> 0.45 g cobalt nitrate hexahydrate was dissolved in 3 mL of deionized (DI) water and 5.5 g 2-methylimidazole(2-MIM) was dissolved in 20 mL of DI water. Those two solutions were mixed and stirred for 6 h at room temperature. The resulting purple precipitates were collected by centrifuging, washed with water for 3 times, and finally vacuum-dried at 80 °C.

### 1.2 Synthesis of MOF-5

In a typical synthesis of MOF-5,<sup>2</sup> 0.5065 g terephthalic acid (PTA) and 850  $\mu$ L triethylamine were dissolved in 40 mL of DMF. 1.699 g  $\text{Zn}(\text{OAc})_2 \cdot 2\text{H}_2\text{O}$  was dissolved in 50 mL of DMF. The zinc salt solution was added to the organic solution forming a precipitate and stirred for 3h. The precipitates were collected by centrifuging, washed with DMF for several times and finally vacuum-dried at 80 °C.

### 1.3 Synthesis of HKUST-1

In a typical synthesis of HKUST-1,<sup>3</sup> 1.22 g  $\text{Cu}(\text{NO}_3)_2 \cdot 3\text{H}_2\text{O}$  and 0.58 g 1,3,5-benzenetricarboxylic acid (BTA) were dissolved in 5 mL dimethylsulfoxide (DMSO) to prepare precursor solution. Then 200  $\mu$ L of the precursor solution was dropped into 10 mL methanol under stirring and stirring for another 10 min. The precipitate was collected by centrifugation, washed with methanol and finally vacuum-dried at 80 °C.

### 1.4 Antibiotics encapsulated and HA decorated of MOFs

The one-step synthesis of Tet@ZIF-67, Tet@MOF-5 and Tet@HKUST-1, and hyaluronic acid (HA) decorated were refer to experimental section with some modification based on the above three methods.

### 1.5 PVP exchange<sup>4</sup>

As-synthesized TZH were dispersed in 10mL of 5% PVP solution, left for 10min, then centrifuged to obtain the supernatant and analyze the amount of antibiotics. This PVP exchange was repeated 2 more times.

### 1.6 Mediating effect of HA

To investigate the mediate function of HA in the process of cell phagocytosis, Rhodamine B (RhB) instead of Tet drugs was encapsulated in the ZIF-8 structure to prepare RhB@ZIF-8 or RhB@ZIF-8@HA. The sterile cover slips were put in 6-well culture plates and macrophages were

seeded at a density of  $5 \times 10^4$  cells per well allowed to adhere for 12 h. The test and control materials were added to the growth media and cultured for 3 h afterwards. Then washed twice with PBS. Finally, the cells were fixed with 4% paraformaldehyde for 15 min at room temperature and washed twice with PBS again. The slides were mounted and observed with a fluorescence microscope imaging system.

## 2. Results and discussion

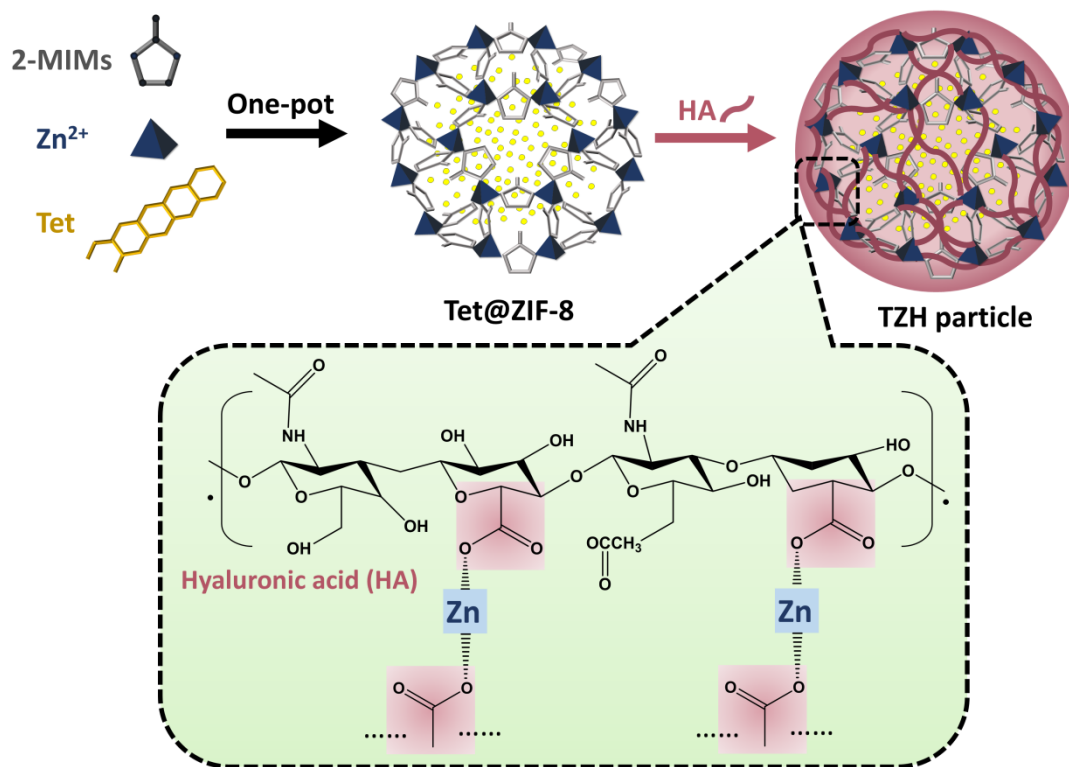

**Scheme S1** Scheme of TZH synthesis.

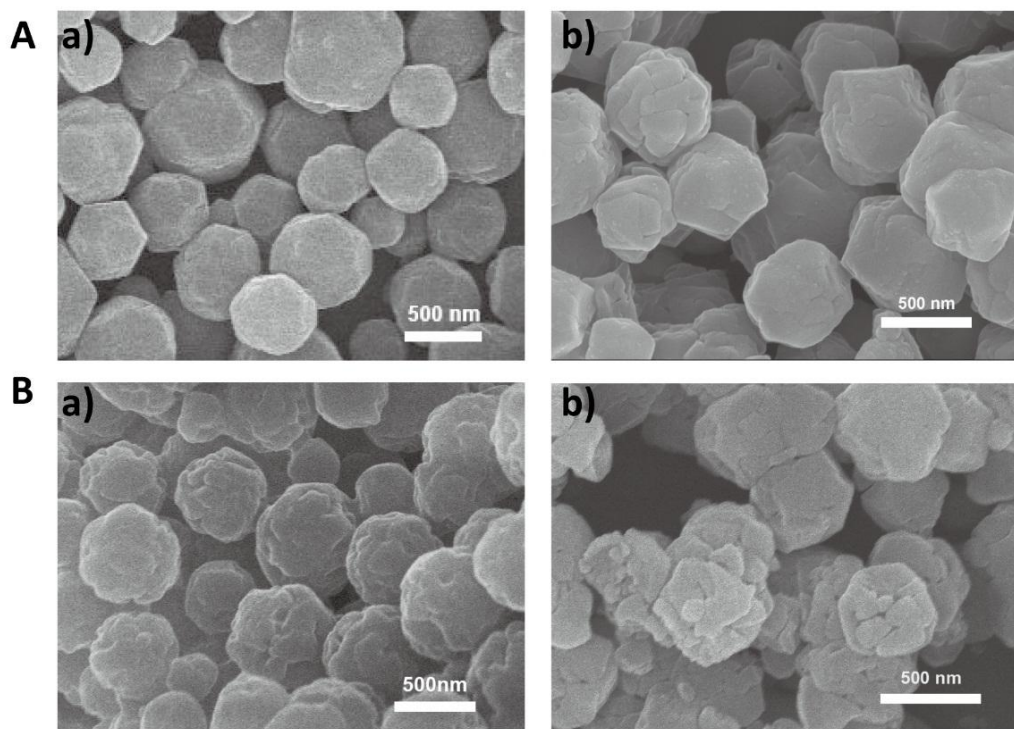

**Fig. S1** SEM image of (A) ZIF-8 and (B) TZe particles. (a) and (b) are freshly prepared and left for two weeks at room temperature, respectively.

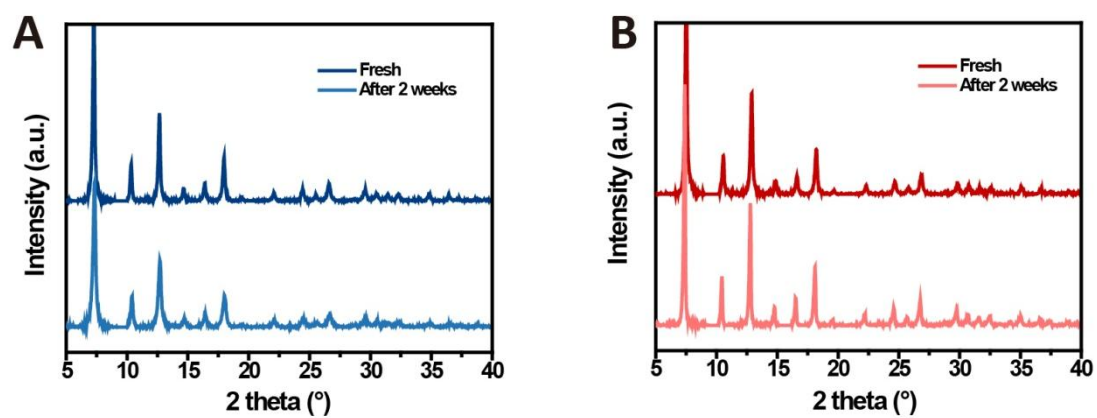

**Fig. S2** XRD patterns of fresh prepared or after placed for 2 weeks at RT of (A) pure ZIF-8 and (B) TZH.

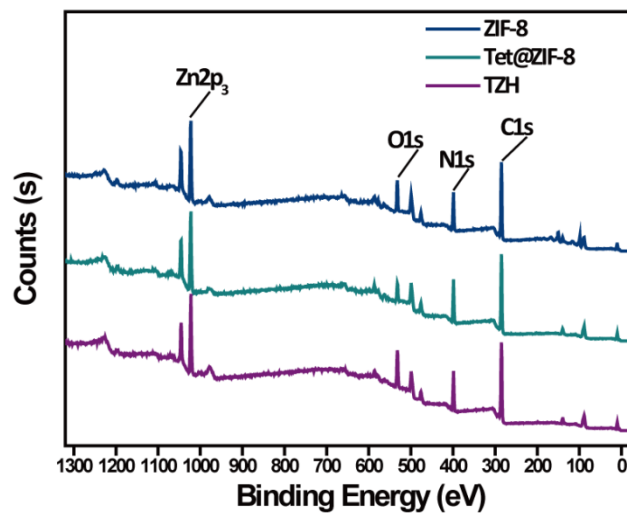

**Fig. S3** XPS spectra of Zn 2p<sub>3</sub>, C 1s, N 1s and O 1s performed on ZIF-8, Tet@ZIF-8 and TZH.

**Table S1** The binding energy regions corresponding to Zn 2p<sub>3</sub>, C 1s, N 1s and O 1s characteristic peaks of XPS experiments performed on ZIF-8, Tet@ZIF-8 and TZH.

| Sample    | Zn 2p <sub>3</sub> | C 1s   | N 1s   | O 1s   |
|-----------|--------------------|--------|--------|--------|
| ZIF-8     | 1022.40            | 285.16 | 399.16 | 532.28 |
| Tet@ZIF-8 | 1022.35            | 285.06 | 399.07 | 532.01 |
| TZH       | 1022.16            | 285.09 | 399.06 | 531.99 |

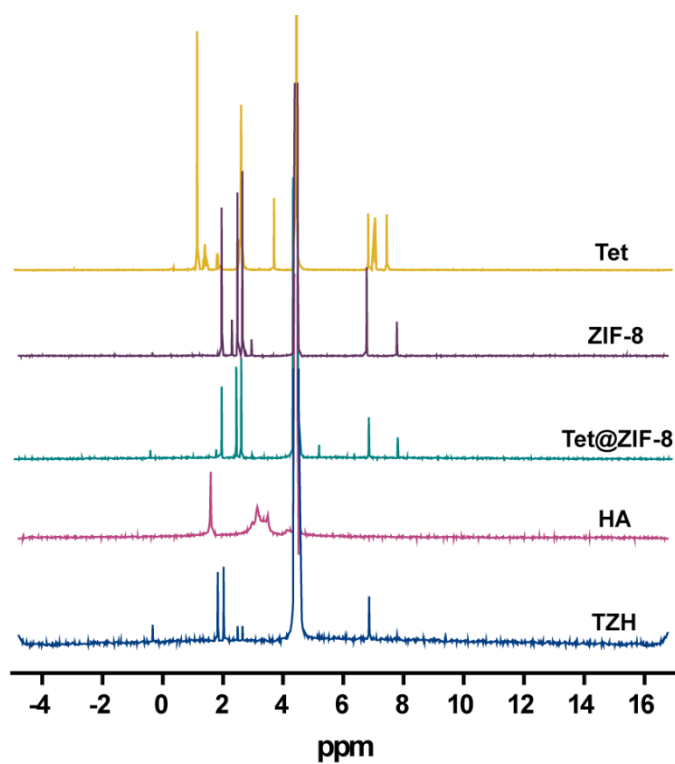

**Fig. S4**  $^1\text{H}$ -NMR line shape of Tet, ZIF-8, Tet@ZIF-8, HA and TZH.

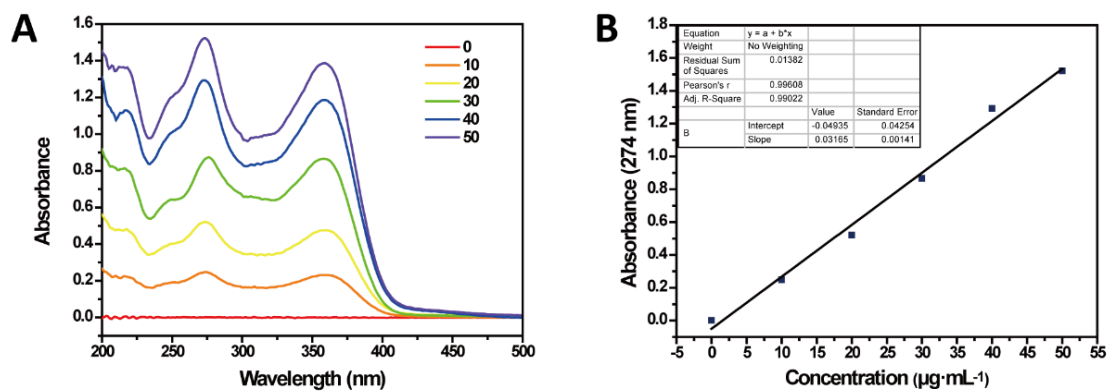

**Fig.S5** The UV-vis absorption spectrum (A) and standard curve (B) of the concentration of tetracycline range from 0-50  $\mu\text{g}\cdot\text{mL}^{-1}$ .

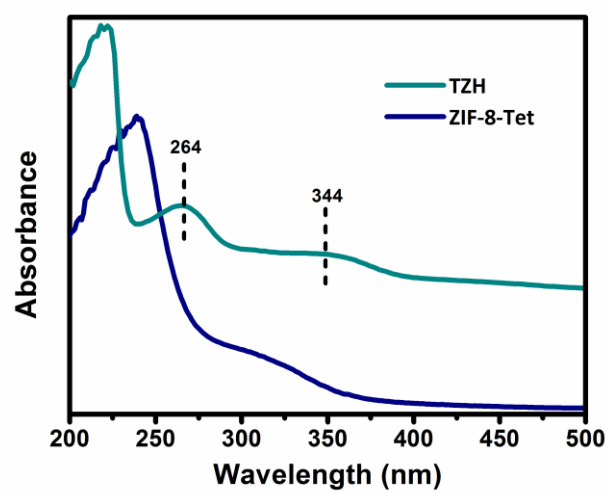

**Fig. S6** UV-vis absorption spectrum of TZH(encapsulated) and ZIF-8-Tet(adsorbed).

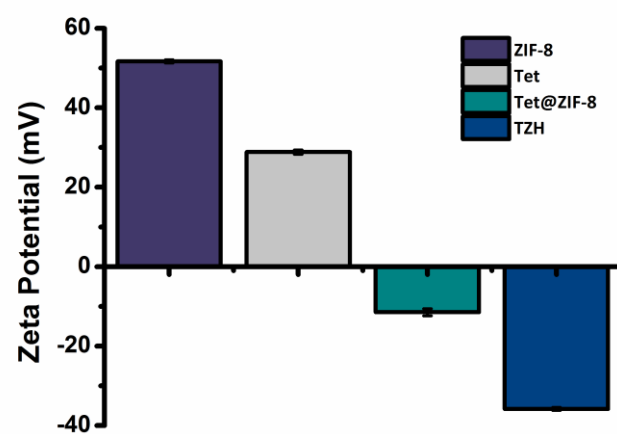

**Fig. S7** Zeta potential of ZIF-8, Tet, Tet@ZIF-8 and TZH.

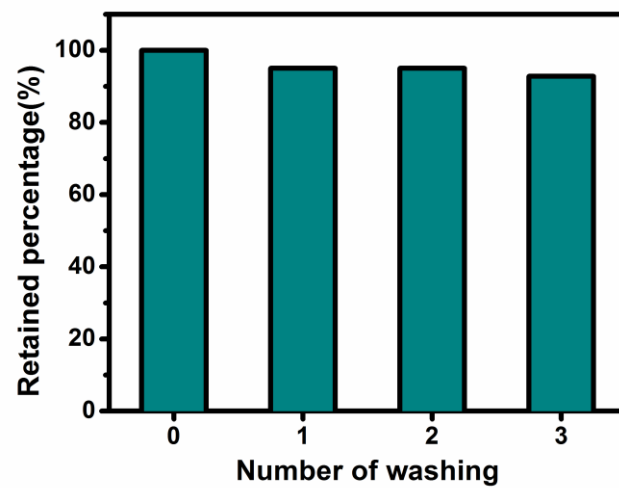

**Fig. S8** PVP exchange results of TZH.

**Table S2** Summary of the BET parameters of the ZIF-8, Tet@ZIF-8 and TZH

| Sample    | BET surface             | Adsorption average pore | BJH Adsorption cumulative           |
|-----------|-------------------------|-------------------------|-------------------------------------|
|           | area(m <sup>2</sup> /g) | diameter(nm)            | volume of pores(cm <sup>3</sup> /g) |
| ZIF-8     | 1,762.31                | 2.1552                  | 0.131649                            |
| Tet@ZIF-8 | 1,779.60                | 2.1278                  | 0.125499                            |
| TZH       | 2,034.34                | 2.0951                  | 0.116224                            |

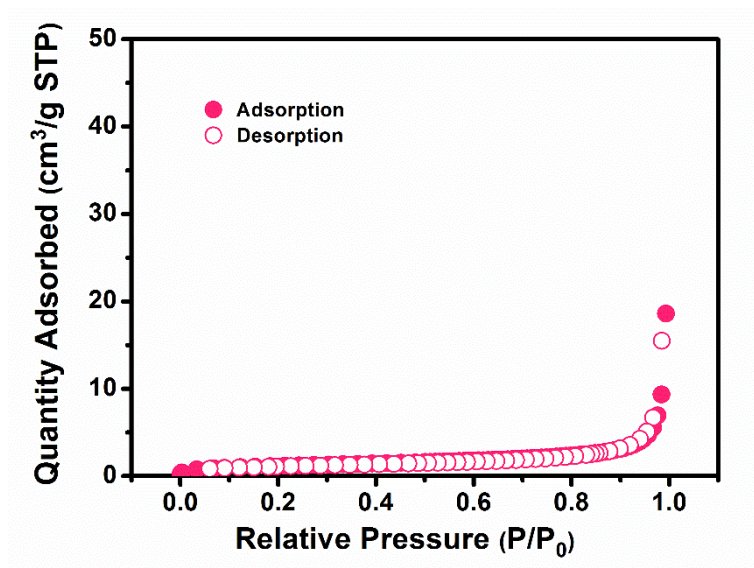

**Fig. S9** N<sub>2</sub> adsorption/desorption isotherms of HA measured at 77 K.

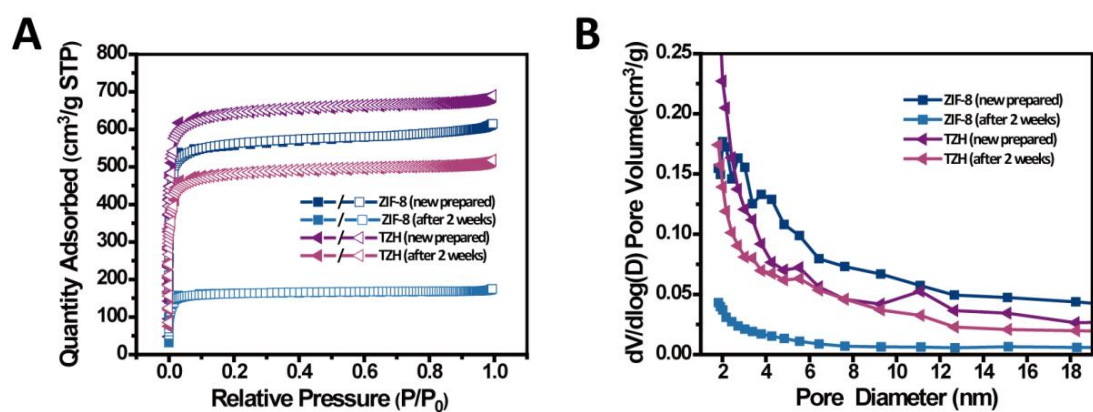

**Fig. S10** (A) N<sub>2</sub> adsorption/desorption isotherms measured at 77 K and (B) corresponding pore size distribution calculated using BJH of ZIF-8 and TZH(new prepared or after placed for 2 weeks).

**Table S3** Summary of the BET parameters of the ZIF-8 and TZH(new prepared or after placed for 2 weeks)

| Sample |               | BET Surface Area<br>(m <sup>2</sup> /g) | Adsorption average<br>pore diameter (nm) | BJH Adsorption cumulative<br>volume of pores(cm <sup>3</sup> /g) |
|--------|---------------|-----------------------------------------|------------------------------------------|------------------------------------------------------------------|
| ZIF-8  | new prepared  | 1,762.31                                | 2.1552                                   | 0.131649                                                         |
|        | after 2 weeks | 503.68                                  | 2.1482                                   | 0.026681                                                         |
| TZH    | new prepared  | 2,034.34                                | 2.0951                                   | 0.116224                                                         |
|        | after 2 weeks | 1,526.65                                | 2.0958                                   | 0.083729                                                         |

**Table S4** The cytotoxicity of ZIF-8 or related composites to different cell types in some previous literatures

| Name          | Cell type  | Dose/ $\mu\text{g}\cdot\text{mL}^{-1}$ (cell viability) | Reference |
|---------------|------------|---------------------------------------------------------|-----------|
| NZIF-8        | HeLa       | 50 (>70%)                                               | 5         |
| ZIF-8         | HeLa       | 100 (50%)                                               | 6         |
|               | J774       | 25 (50%)                                                |           |
|               | MDA-MB-231 |                                                         |           |
| ZIF-8         | MDA-MB-468 | 250 (75–90%)                                            | 7         |
|               | MCF-7      |                                                         |           |
|               | NCI        |                                                         |           |
| ZIF-8         | HT-29      | >25 (unmeasured, 50%)                                   | 8         |
|               | HL-60      |                                                         |           |
| PAA@ZIF-8 NPs | MCF-7      | 50 (>90.8%)                                             | 9         |
| ZIF-8/GO      | 4T1        | 100 (close to 100%)                                     | 10        |
| TZH           | RAW 264.7  | 50 (>80%)                                               | This work |

### RhB@ZIF-8

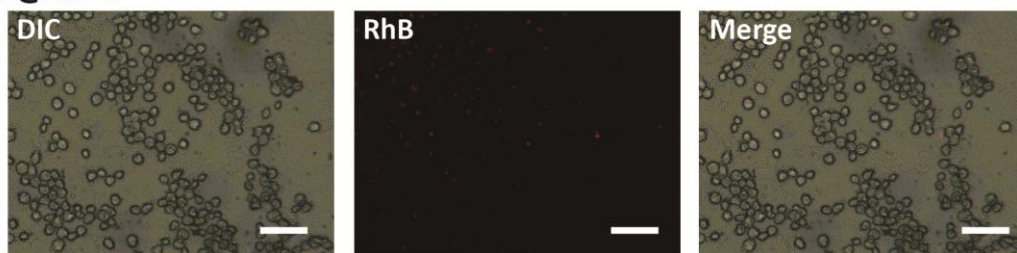

### RhB@ZIF-8@HA

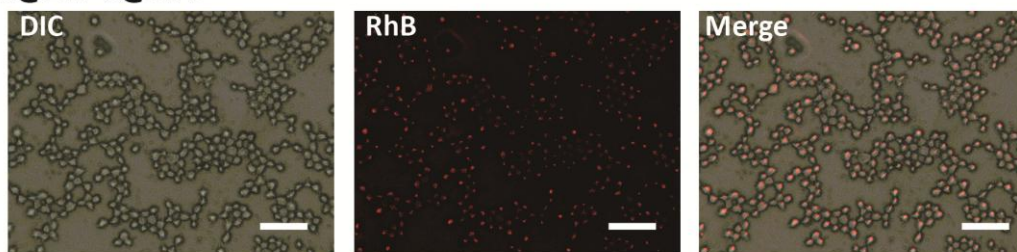

**Fig. S11** Co-localization of RhB@ZIF-8@HA and macrophages. All scale bars are 50  $\mu\text{m}$ .

## References

1. J. Qian, F. Sun and L. Qin, *Materials Letters*, 2012, **82**, 220-223.
2. D. J. Tranchemontagne, J. R. Hunt and O. M. Yaghi, *Tetrahedron*, 2008, **64**, 8553-8557.
3. J.-L. Zhuang, D. Ceglarek, S. Pethuraj and A. Terfort, *Advanced Functional Materials*, 2011, **21**, 1442-1447.
4. J. Zhuang, C.-H. Kuo, L.-Y. Chou, D.-Y. Liu, E. Weerapana and C.-K. Tsung, *Acs Nano*, 2014, **8**, 2812-2819.
5. M. Zheng, S. Liu, X. Guan and Z. Xie, *Acs Applied Materials & Interfaces*, 2015, **7**, 22181-22187.
6. C. Tamames-Tabar, D. Cunha, E. Imbuluzqueta, F. Ragon, C. Serre, M. J. Blanco-Prieto and P. Horcajada, *Journal of Materials Chemistry B*, 2014, **2**, 262-271.
7. H. Zheng, Y. Zhang, L. Liu, W. Wan, P. Guo, A. M. Nystrom and X. Zou, *Journal of the American Chemical Society*, 2016, **138**, 962-968.
8. I. B. Vasconcelos, T. G. da Silva, G. C. G. Militao, T. A. Soares, N. M. Rodrigues, M. O. Rodrigues, N. B. da Costa, Jr., R. O. Freire and S. A. Junior, *Rsc Advances*, 2012, **2**, 9437-9442.
9. H. Ren, L. Zhang, J. An, T. Wang, L. Li, X. Si, L. He, X. Wu, C. Wang and Z. Su, *Chemical Communications*, 2014, **50**, 1000-1002.
10. Z. Tian, X. Yao and Y. Zhu, *Microporous and Mesoporous Materials*, 2017, **237**, 160-167.
